# Supplementary material for: Differential Regulation of Gonadotropins as Revealed by Transcriptomes of Distinct LH and FSH Cells of Fish Pituitary
Source: MDPI journal article supplement (doi:10.3390/ijms22126478), 2021-06-17
Supplement: s1 [file s1]

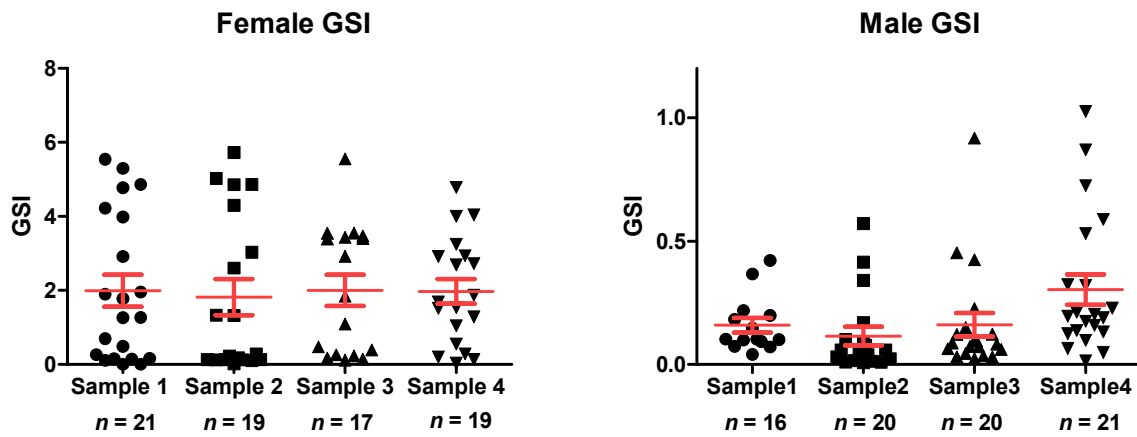

**Figure S1.** Gonado somatic index (gonad weight/total weight) of the fish used for pituitary harvesting in each FACS sample.

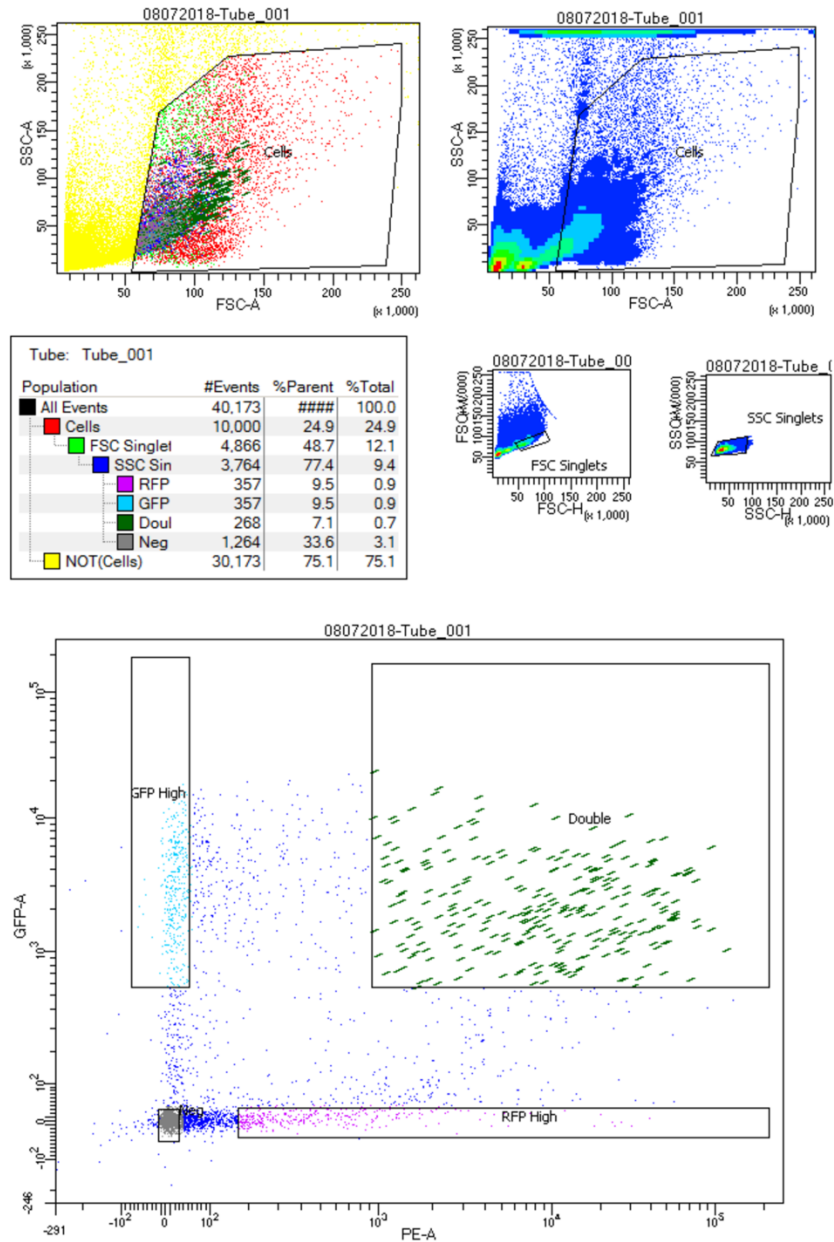

**Figure S2.** The complete gating parameters of the FACS assay for LH and FSH cells separation.

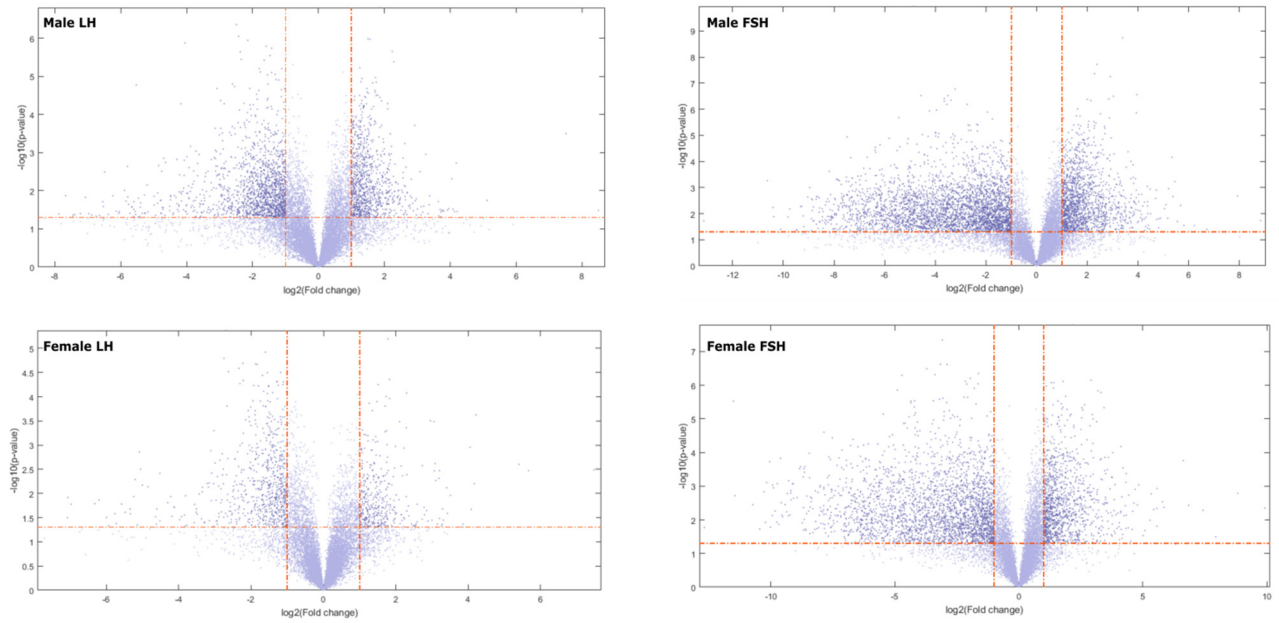

**Figure S3.** Volcano plots of the genes in each RNAseq library. with read count >20. The plots describing the gene distribution in each fraction according to their fold change and p-value compared to the negative fraction. Red lines represent the cutoff of genes with  $p < 0.05$  and fold change >2. Volcano plots were prepared using MATLAB mavolcanoplot command.

**Table S1.** Primers used for real time validation of the sorted fractions.

| Name   | Position | 5' to 3' sequence    | Slope | R <sup>2</sup> |
|--------|----------|----------------------|-------|----------------|
| LH_F   | 109      | TATCTCCTGCAGCGGCCTT  | -3.35 | 1              |
| LH_R   | 327      | TACACCAGGTGGGCAATCG  |       |                |
| FSH_F  | 45       | AGAGGATGCAGCTGGTTG   | -3.52 | 1              |
| FSH_R  | 171      | GTTGGGATCCTTCTGGAAAG |       |                |
| GH_F   | 151      | TGCTCGCCCAGAGACTCTTC | -3.52 | 1              |
| GH_R   | 135      | TGGGAAACTCCCAGGACTCA |       |                |
| EF1A_F | 438      | GCACGCTCTGCTGGCCTTT  | -3.49 | 1.93           |
| EF1A_R | 688      | GCGCTCAATCTTCCATCCC  |       |                |

**Table S2.** log<sub>2</sub>(fold change) values of pituitary hormones in the collected cell fractions.

| Protein Name | Gene ID      | FSH Cells Males | FSH Cells Females | LH Cells Males | LH Cells Females |
|--------------|--------------|-----------------|-------------------|----------------|------------------|
| fshβ         | fshb         | 8.837754463     | 9.905770131       | 0.868759321    | 0.080738747      |
| lhβ          | LOC100534501 | 0.393589203     | 0.897771633       | 8.502444908    | 7.598570358      |
| cga          | cga          | 4.407142408     | 3.732029127       | 2.424932231    | 0.430062612      |

|             |              |              |              |              |              |
|-------------|--------------|--------------|--------------|--------------|--------------|
| gh          | LOC100534452 | -5.921503739 | -7.805671863 | -3.248507567 | -3.573404686 |
| prl(1)      | LOC100534522 | -4.212938494 | -6.043186502 | -2.711944967 | -2.833833834 |
| prl(2)      | LOC100534523 | -4.984764177 | -6.563761933 | -3.066079508 | -3.516573681 |
| tsh $\beta$ | LOC100534562 | -7.405845506 | -12.05531371 | -2.110557386 | -2.69508372  |
| pomc        | pomc         | -6.645254836 | -7.413334818 | 0.877120029  | 0.69733075   |
| sl          | LOC100711096 | -5.577935741 | -8.79004548  | 0.887309161  | 0.057638845  |

**Table S3.** Top 10 genes expressed in each fraction according to the fold change in respect to the negative fraction.

|           | Row.Names    | GeneID    | Protein Product | Protein Name                                                                       | Log2Fold-Change |                | Padj                   |                         | Av_Norm  |         |
|-----------|--------------|-----------|-----------------|------------------------------------------------------------------------------------|-----------------|----------------|------------------------|-------------------------|----------|---------|
|           |              |           |                 |                                                                                    | LH.V<br>S.Neg   | FSH.V<br>S.Neg | LH.V<br>S.Neg          | FSH.V<br>S.Neg          | FSH      | LH      |
| LH Male   | LOC100534501 | 100534501 | XP_025753499.1  | gonadotropin subunit beta-2                                                        | 8.50            | 0.39           | 4.95x10 <sup>-38</sup> | 6.46x10 <sup>-01</sup>  | 20.29    | 5653.06 |
|           | esr2         | 100534556 | XP_025756490.1  | estrogen receptor beta isoform X2                                                  | 5.86            | 5.41           | 2.60x10 <sup>-34</sup> | 4.49x10 <sup>-31</sup>  | 399.39   | 544.83  |
|           | LOC100703182 | 100703182 | XP_019219020.1  | calmodulin regulator protein PCP4 isoform X3                                       | 5.24            | 3.90           | 2.66x10 <sup>-13</sup> | 3.70x10 <sup>-08</sup>  | 42.01    | 107.30  |
|           | apln         | 106098248 | XP_013126785.1  | apelin                                                                             | 5.05            | 4.32           | 2.75x10 <sup>-23</sup> | 3.42x10 <sup>-18</sup>  | 112.60   | 187.34  |
|           | LOC100692465 | 100692465 | XP_003451467.2  | fibroblast growth factor receptor 4                                                | 5.00            | -0.52          | 1.87x10 <sup>-28</sup> | 3.82x10 <sup>-01</sup>  | 11.18    | 524.88  |
|           | LOC100693277 | 100693277 | XP_003451807.1  | thrombospondin-4-B                                                                 | 4.97            | -0.47          | 6.05x10 <sup>-13</sup> | 6.42x10 <sup>-01</sup>  | 2.24     | 115.14  |
|           | dlk3         | 100698746 | XP_005478670.1  | serine/threonine-protein kinase DCLK3 isoform X1                                   | 4.72            | 3.87           | 6.38x10 <sup>-14</sup> | 3.39x10 <sup>-10</sup>  | 117.65   | 214.06  |
|           | LOC102077685 | 102077685 | XP_025752955.1  | uncharacterized protein LOC102077685 isoform X1                                    | 4.54            | 1.45           | 3.32x10 <sup>-15</sup> | 2.41x10 <sup>-02</sup>  | 20.21    | 177.06  |
|           | LOC100695867 | 100695867 | XP_003454281.2  | bifunctional heparan sulfate N-deacetylase/N-sulfotransferase 4 isoform X1         | 4.39            | 5.10           | 1.09x10 <sup>-24</sup> | 3.69x10 <sup>-35</sup>  | 1191.13  | 728.43  |
|           | LOC102083321 | 102083321 | XP_019219833.1  | probable cyclin-dependent serine/threonine-protein kinase DDB_G0292550             | 4.24            | -1.93          | 1.11x10 <sup>-09</sup> | 1.00x10 <sup>-01</sup>  | 0.54     | 53.01   |
| FSH Male  | fshb         | 100534500 | XP_013130155.1  | follicleotropin subunit beta isoform X1                                            | 0.87            | 8.84           | 3.13x10 <sup>-01</sup> | 5.64x10 <sup>-50</sup>  | 4857.370 | 193.54  |
|           | LOC100690909 | 100690909 | XP_003443146.1  | retinal cone rhodopsin-sensitive cGMP 3',5'-cyclic phosphodiesterase subunit gamma | 1.57            | 8.01           | 1.39x10 <sup>-01</sup> | 3.85x10 <sup>-24</sup>  | 6314.32  | 72.42   |
|           | LOC100700667 | 100700667 | XP_005457923.1  | cholecystokinin receptor                                                           | 2.62            | 7.92           | 1.05x10 <sup>-16</sup> | 1.31x10 <sup>-159</sup> | 2011.298 | 511.82  |
|           | tyr          | 100707700 | XP_003441635.1  | tyrosinase                                                                         | 0.95            | 6.35           | 7.14x10 <sup>-01</sup> | 3.73x10 <sup>-07</sup>  | 28.20    | 0.66    |
|           | LOC100693617 | 100693617 | XP_019204240.1  | tumor necrosis factor alpha-induced protein 2                                      | 0.29            | 6.20           | 7.84x10 <sup>-01</sup> | 4.24x10 <sup>-29</sup>  | 534.15   | 8.80    |
|           | LOC109195942 | 109195942 | XP_019204245.1  | tumor necrosis factor alpha-induced protein 2                                      | -0.26           | 5.73           | 8.88x10 <sup>-01</sup> | 1.26x10 <sup>-14</sup>  | 101.38   | 1.50    |
|           | LOC102076330 | 102076330 | XP_005476240.1  | uncharacterized protein LOC102076330                                               | 3.17            | 5.67           | 3.10x10 <sup>-11</sup> | 2.26x10 <sup>-37</sup>  | 758.63   | 134.79  |
|           | LOC109195943 | 109195943 | XP_019204247.1  | tumor necrosis factor alpha-induced protein 2                                      | 0.30            | 5.50           | 8.81x10 <sup>-01</sup> | 1.06x10 <sup>-07</sup>  | 127.80   | 3.43    |
|           | esr2         | 100534556 | XP_025756490.1  | estrogen receptor beta isoform X2                                                  | 5.86            | 5.41           | 2.60x10 <sup>-34</sup> | 4.49x10 <sup>-31</sup>  | 399.39   | 544.83  |
|           | LOC100705614 | 100705614 | XP_003452020.1  | homeobox protein zampogna                                                          | 4.21            | 5.36           | 6.00x10 <sup>-09</sup> | 1.71x10 <sup>-15</sup>  | 79.76    | 36.24   |
| LH Female | LOC100534501 | 100534501 | XP_025753499.1  | gonadotropin subunit beta-2                                                        | 7.60            | 0.90           | 6.31x10 <sup>-83</sup> | 9.76x10 <sup>-02</sup>  | 12.76    | 1334.85 |
|           | LOC100707060 | 100707060 | XP_019207775.1  | collagen alpha-2(V) chain                                                          | 5.44            | 2.71           | 7.47x10 <sup>-17</sup> | 8.38x10 <sup>-05</sup>  | 19.28    | 128.33  |

|            |              |           |                |                                                                                    |       |       |                        |                         |          |       |
|------------|--------------|-----------|----------------|------------------------------------------------------------------------------------|-------|-------|------------------------|-------------------------|----------|-------|
|            | LOC102083321 | 102083321 | XP_019219833.1 | probable cyclin-dependent serine/threonine-protein kinase DDB_G0292550             | 4.47  | -1.38 | 9.15x10 <sup>-05</sup> | 4.62x10 <sup>-01</sup>  | 0.23     | 19.80 |
|            | LOC100693277 | 100693277 | XP_003451807.1 | thrombospondin-4-B                                                                 | 4.46  | 0.52  | 2.74x10 <sup>-09</sup> | 6.47x10 <sup>-01</sup>  | 2.09     | 38.79 |
|            | esr2         | 100534556 | XP_025756490.1 | estrogen receptor beta isoform X2                                                  | 4.35  | 5.71  | 1.52x10 <sup>-20</sup> | 4.68x10 <sup>-38</sup>  | 216.91   | 84.90 |
|            | hnf4a        | 100706245 | XP_005477971.2 | hepatocyte nuclear factor 4-alpha isoform X1                                       | 4.12  | 4.60  | 1.64x10 <sup>-09</sup> | 4.40x10 <sup>-13</sup>  | 54.65    | 40.21 |
|            | pgr          | 100534498 | XP_005455130.1 | progesterone receptor                                                              | 3.63  | -2.80 | 6.82x10 <sup>-05</sup> | 6.93x10 <sup>-02</sup>  | 0.00     | 17.90 |
|            | LOC102077685 | 102077685 | XP_025752955.1 | uncharacterized protein LOC102077685 isoform X1                                    | 3.54  | 0.88  | 8.85x10 <sup>-11</sup> | 2.13x10 <sup>-01</sup>  | 6.60     | 43.63 |
|            | LOC100711803 | 100711803 | XP_025756324.1 | chemokine XC receptor 1-like isoform X1                                            | 3.49  | -3.82 | 1.71x10 <sup>-06</sup> | 5.60x10 <sup>-03</sup>  | 0.00     | 33.71 |
|            | LOC100692815 | 100692815 | XP_003450308.1 | fucoselectin-6 isoform X1                                                          | 3.44  | -3.06 | 4.26x10 <sup>-04</sup> | 4.93x10 <sup>-02</sup>  | 0.00     | 19.50 |
| FSH Female | fshb         | 100534500 | XP_013130155.1 | follicleotropin subunit beta isoform X1                                            | 0.08  | 9.91  | 9.53x10 <sup>-01</sup> | 1.61x10 <sup>-203</sup> | 33947.74 | 37.09 |
|            | LOC100700667 | 100700667 | XP_005457923.1 | cholecystokinin receptor                                                           | 1.56  | 8.85  | 6.91x10 <sup>-05</sup> | 7.88x10 <sup>-174</sup> | 8826.10  | 55.43 |
|            | LOC100690909 | 100690909 | XP_003443146.1 | retinal cone rhodopsin-sensitive cGMP 3',5'-cyclic phosphodiesterase subunit gamma | 0.32  | 7.93  | 7.78x10 <sup>-01</sup> | 3.16x10 <sup>-97</sup>  | 3994.39  | 20.62 |
|            | LOC109195943 | 109195943 | XP_019204247.1 | tumor necrosis factor alpha-induced protein 2                                      | 1.44  | 7.32  | 5.77x10 <sup>-01</sup> | 2.56x10 <sup>-11</sup>  | 94.40    | 2.09  |
|            | LOC100693617 | 100693617 | XP_019204240.1 | tumor necrosis factor alpha-induced protein 2                                      | -0.57 | 6.96  | 7.88x10 <sup>-01</sup> | 2.70x10 <sup>-37</sup>  | 326.99   | 1.42  |
|            | LOC100698925 | 100698925 | XP_013124338.1 | xin actin-binding repeat-containing protein 2 isoform X1                           | 1.50  | 6.34  | 4.64x10 <sup>-03</sup> | 2.08x10 <sup>-53</sup>  | 1483.47  | 52.59 |
|            | cdh16        | 100709162 | XP_003445808.2 | cadherin-16                                                                        | 0.80  | 6.02  | 7.83x10 <sup>-01</sup> | 1.38x10 <sup>-10</sup>  | 55.52    | 1.39  |
|            | LOC100690064 | 100690064 | XP_005460328.2 | LOW QUALITY PROTEIN: steroid hormone receptor ERR2                                 | 1.38  | 5.74  | 7.74x10 <sup>-02</sup> | 6.07x10 <sup>-31</sup>  | 174.38   | 9.35  |
|            | esr2         | 100534556 | XP_025756490.1 | estrogen receptor beta isoform X2                                                  | 4.35  | 5.71  | 1.52x10 <sup>-20</sup> | 4.68x10 <sup>-38</sup>  | 216.91   | 84.90 |
|            | LOC100703182 | 100703182 | XP_019219020.1 | calmodulin regulator protein PCP4 isoform X3                                       | 5.80  | 5.59  | 1.21x10 <sup>-05</sup> | 6.07x10 <sup>-06</sup>  | 9.82     | 12.79 |

**Table S4.** GPCRs identified in BRITE functional analysis in males.

|    | BRITE functional hierarchies | Gene ID      | Protein Name                                      | log2Fold-Change |             | Av_Norm |       | Padj                   |                        |
|----|------------------------------|--------------|---------------------------------------------------|-----------------|-------------|---------|-------|------------------------|------------------------|
|    |                              |              |                                                   | LH.V S.neg      | FSH.v s.neg | LH      | FSH   | LH.VS .Neg             | FSH.V S.Neg            |
| LH | Adhesion receptor family     | LOC102082324 | adhesion G-protein coupled receptor D2 isoform X5 | 2.07            | 1.47        | 31.54   | 19.67 | 5.09x10 <sup>-04</sup> | 1.21x10 <sup>-02</sup> |
|    | Others                       | cnr1         | cannabinoid receptor 1                            | 1.42            | -0.40       | 24.66   | 7.21  | 4.91x10 <sup>-02</sup> | 6.00x10 <sup>-01</sup> |
|    | Others                       | LOC100692145 | G-protein coupled receptor 61                     | 3.22            | 2.38        | 17.98   | 9.96  | 2.17x10 <sup>-04</sup> | 5.76x10 <sup>-03</sup> |
|    | Biogenic amine               | drd2         | D(2) dopamine receptor isoform X1                 | 3.24            | 1.79        | 72.86   | 26.24 | 1.75x10 <sup>-14</sup> | 4.37x10 <sup>-05</sup> |
|    | Biogenic amine               | drd3         | D(3) dopamine receptor isoform X1                 | 1.65            | -3.19       | 26.24   | 0.77  | 2.21x10 <sup>-02</sup> | 1.05x10 <sup>-03</sup> |
|    | Biogenic amine               | LOC100700659 | histamine H2 receptor                             | 1.56            | -4.16       | 19.97   | 0.20  | 9.06x10 <sup>-02</sup> | 1.17x10 <sup>-03</sup> |
|    | Biogenic amine               | LOC100534567 | muscarinic receptor 4 subtype isoform X1          | 2.56            | -0.50       | 50.32   | 6.10  | 2.31x10 <sup>-10</sup> | 3.62x10 <sup>-01</sup> |
|    | Lipid                        | gpr34        | probable G-protein coupled receptor 34            | 1.69            | -1.51       | 36.81   | 4.00  | 3.35x10 <sup>-02</sup> | 6.58x10 <sup>-02</sup> |
|    | Lipid                        | LOC102080433 | prostaglandin E2 receptor EP1 subtype isoform X2  | 1.30            | -6.10       | 137.53  | 1.16  | 1.71x10 <sup>-03</sup> | 1.61x10 <sup>-13</sup> |
|    | Lipid                        | s1pr1        | sphingosine 1-phosphate receptor 1                | 1.02            | -3.76       | 48.02   | 1.80  | 2.11x10 <sup>-02</sup> | 1.88x10 <sup>-09</sup> |

|     |                                        |              |                                                                               |       |       |        |        |                        |                        |
|-----|----------------------------------------|--------------|-------------------------------------------------------------------------------|-------|-------|--------|--------|------------------------|------------------------|
|     | Metabotropic glutamate receptor family | gabbr1       | gamma-aminobutyric acid type B receptor subunit 1 isoform X3                  | 1.91  | -0.57 | 40.52  | 7.59   | 2.60x10 <sup>-03</sup> | 4.32x10 <sup>-01</sup> |
|     | Metabotropic glutamate receptor family | LOC100697448 | probable G-protein coupled receptor 158                                       | 1.32  | -1.60 | 146.57 | 18.84  | 3.60x10 <sup>-04</sup> | 2.14x10 <sup>-05</sup> |
|     | Peptide                                | LOC100712161 | delta-type opioid receptor                                                    | 1.92  | -0.68 | 19.85  | 3.05   | 5.22x10 <sup>-03</sup> | 4.03x10 <sup>-01</sup> |
|     | Peptide                                | LOC102077197 | galanin receptor type 2                                                       | 1.19  | -3.99 | 34.33  | 0.91   | 5.89x10 <sup>-02</sup> | 5.32x10 <sup>-06</sup> |
|     | Peptide                                | LOC100699280 | growth hormone secretagogue receptor type 1 isoform X1                        | 2.26  | -1.79 | 16.17  | 1.04   | 5.00x10 <sup>-03</sup> | 9.95x10 <sup>-02</sup> |
|     | Peptide                                | nmb          | neuromedin-B receptor                                                         | 1.44  | -5.06 | 531.66 | 5.76   | 2.17x10 <sup>-02</sup> | 1.11x10 <sup>-17</sup> |
|     | Peptide                                | ntsr1        | neurotensin receptor type 1 isoform X3                                        | 2.32  | -6.88 | 337.33 | 0.44   | 9.41x10 <sup>-20</sup> | 3.08x10 <sup>-14</sup> |
|     | Peptide                                | LOC100702751 | prolactin-releasing peptide receptor                                          | 2.62  | 0.80  | 11.61  | 3.49   | 1.61x10 <sup>-02</sup> | 4.92x10 <sup>-01</sup> |
|     | Peptide                                | LOC100692730 | prolactin-releasing peptide receptor isoform X1                               | 1.56  | -3.28 | 23.95  | 1.00   | 1.90x10 <sup>-02</sup> | 7.24x10 <sup>-04</sup> |
|     | Peptide                                | LOC100534508 | putative gonadotropin-releasing hormone II receptor                           | 3.68  | -2.69 | 226.32 | 2.48   | 6.94x10 <sup>-17</sup> | 1.49x10 <sup>-05</sup> |
|     | Peptide                                | LOC100696221 | relaxin-3 receptor 1-like                                                     | 1.95  | -1.24 | 11.78  | 1.63   | 1.90x10 <sup>-02</sup> | 2.32x10 <sup>-01</sup> |
|     | Peptide                                | ssstr3       | somatostatin receptor type 3                                                  | 3.70  | 2.71  | 71.43  | 35.19  | 8.39x10 <sup>-11</sup> | 1.84x10 <sup>-06</sup> |
|     | Peptide                                | agtr1        | type-1 angiotensin II receptor isoform X1                                     | 2.17  | -5.16 | 91.38  | 0.31   | 1.91x10 <sup>-10</sup> | 5.89x10 <sup>-08</sup> |
|     | Secretin receptor family               | gcgr         | glucagon receptor                                                             | 1.10  | -2.17 | 58.92  | 5.79   | 7.82x10 <sup>-04</sup> | 3.24x10 <sup>-08</sup> |
|     | Secretin receptor family               | LOC100710530 | pituitary adenylate cyclase-activating polypeptide type I receptor isoform X1 | 1.84  | -3.60 | 324.66 | 6.14   | 6.85x10 <sup>-08</sup> | 5.46x10 <sup>-19</sup> |
|     | Secretin receptor family               | LOC100710985 | pituitary adenylate cyclase-activating polypeptide type I receptor isoform X1 | 1.34  | -0.18 | 69.49  | 23.48  | 5.20x10 <sup>-03</sup> | 7.46x10 <sup>-01</sup> |
|     | Secretin receptor family               | LOC100698743 | receptor activity-modifying protein 1 isoform X2                              | 1.42  | -1.65 | 22.35  | 2.78   | 3.82x10 <sup>-02</sup> | 2.84x10 <sup>-02</sup> |
|     | Vision                                 | LOC100702425 | pinopsin isoform X1                                                           | 1.67  | -3.37 | 73.93  | 2.48   | 2.87x10 <sup>-03</sup> | 7.87x10 <sup>-07</sup> |
|     | Vision                                 | LOC100695085 | vertebrate ancient opsin                                                      | 1.20  | -4.46 | 122.65 | 2.32   | 2.66x10 <sup>-01</sup> | 1.55x10 <sup>-06</sup> |
|     |                                        |              |                                                                               |       |       |        |        |                        |                        |
| FSH | Biogenic amine                         | htr1b        | 5-hydroxytryptamine receptor 1B                                               | 1.15  | 1.96  | 53.99  | 95.02  | 1.46x10 <sup>-01</sup> | 2.26x10 <sup>-03</sup> |
|     | Adhesion receptor family               | adgrb2       | adhesion G protein-coupled receptor B2 isoform X5                             | 1.74  | 2.01  | 294.70 | 354.39 | 3.30x10 <sup>-10</sup> | 1.78x10 <sup>-14</sup> |
|     | Adhesion receptor family               | LOC100698301 | adhesion G protein-coupled receptor L1 isoform X3                             | 1.07  | 2.87  | 84.98  | 294.62 | 1.99x10 <sup>-03</sup> | 7.49x10 <sup>-24</sup> |
|     | Adhesion receptor family               | LOC102080577 | adhesion G-protein coupled receptor G7 isoform X2                             | 0.08  | 1.42  | 6.37   | 16.19  | 9.43x10 <sup>-01</sup> | 1.65x10 <sup>-02</sup> |
|     | Adhesion receptor family               | celsr3       | cadherin EGF LAG seven-pass G-type receptor 3 isoform X1                      | 1.06  | 1.15  | 665.82 | 706.36 | 1.08x10 <sup>-04</sup> | 7.56x10 <sup>-06</sup> |
|     | Base and nucleoside                    | LOC102076535 | P2Y purinoceptor 14 isoform X2                                                | -0.77 | 2.02  | 2.82   | 20.13  | 5.27x10 <sup>-01</sup> | 4.25x10 <sup>-03</sup> |
|     | Biogenic amine                         | drd5         | D(1B) dopamine receptor                                                       | 0.16  | 2.51  | 6.23   | 32.57  | 8.83x10 <sup>-01</sup> | 2.50x10 <sup>-06</sup> |
|     | Frizzled / Smoothened family           | fzd5         | frizzled-5                                                                    | -0.17 | 2.44  | 6.07   | 35.77  | 8.69x10 <sup>-01</sup> | 2.23x10 <sup>-07</sup> |
|     | Lipid                                  | LOC100708895 | free fatty acid receptor 3-like                                               | -0.41 | 2.60  | 3.28   | 26.82  | 7.47x10 <sup>-01</sup> | 8.24x10 <sup>-05</sup> |
|     | Metabotropic glutamate receptor family | gabbr2       | gamma-aminobutyric acid type B receptor subunit 2                             | 0.95  | 1.66  | 46.18  | 76.40  | 4.52x10 <sup>-02</sup> | 1.41x10 <sup>-05</sup> |
|     | Metabotropic glutamate receptor family | gprc5c       | G-protein coupled receptor family C group 5 member C isoform X3               | 0.25  | 1.07  | 130.50 | 229.61 | 4.86x10 <sup>-01</sup> | 1.59x10 <sup>-05</sup> |
|     | Metabotropic glutamate receptor family | LOC100705106 | LOW QUALITY PROTEIN: metabotropic glutamate receptor 7                        | 0.12  | 1.43  | 11.41  | 28.61  | 8.84x10 <sup>-01</sup> | 5.32x10 <sup>-04</sup> |

|        |                                        |                |                                                                    |       |      |        |          |                        |                         |
|--------|----------------------------------------|----------------|--------------------------------------------------------------------|-------|------|--------|----------|------------------------|-------------------------|
|        | Metabotropic glutamate receptor family | LOC100700221   | metabotropic glutamate receptor 4                                  | 1.15  | 1.74 | 19.02  | 29.47    | 1.03x10 <sup>-01</sup> | 2.09x10 <sup>-03</sup>  |
|        | Metabotropic glutamate receptor family | grm5           | metabotropic glutamate receptor 5 isoform X2                       | 1.64  | 4.30 | 149.71 | 938.87   | 1.13x10 <sup>-03</sup> | 4.36x10 <sup>-23</sup>  |
|        | Metabotropic glutamate receptor family | gprc5a         | retinoic acid-induced protein 3                                    | -0.15 | 3.33 | 3.28   | 36.89    | 9.25x10 <sup>-01</sup> | 6.48x10 <sup>-06</sup>  |
|        | Others                                 | gpr135         | G-protein coupled receptor 135                                     | 0.85  | 1.25 | 13.13  | 17.74    | 1.53x10 <sup>-01</sup> | 6.41x10 <sup>-03</sup>  |
|        | Others                                 | gpr135         | probable G-protein coupled receptor 153 isoform X1                 | 0.93  | 1.63 | 78.19  | 126.52   | 5.05x10 <sup>-03</sup> | 4.73x10 <sup>-09</sup>  |
|        | Others                                 | LOC100702509   | probable G-protein coupled receptor 173                            | 0.82  | 1.38 | 135.29 | 199.02   | 1.03x10 <sup>-02</sup> | 2.83x10 <sup>-07</sup>  |
|        | Others                                 | gpr85          | probable G-protein coupled receptor 85                             | 1.56  | 2.54 | 83.96  | 166.59   | 4.42x10 <sup>-07</sup> | 3.97x10 <sup>-20</sup>  |
|        | Peptide                                | LOC100700667   | cholecystokinin receptor                                           | 2.62  | 7.92 | 511.82 | 2011.298 | 1.05x10 <sup>-16</sup> | 1.31x10 <sup>-159</sup> |
|        | Peptide                                | LOC100534509   | GnRH receptor type2                                                | 0.18  | 2.26 | 11.63  | 48.04    | 8.48x10 <sup>-01</sup> | 2.74x10 <sup>-06</sup>  |
|        | Peptide                                | LOC100693278   | melanocortin receptor 5                                            | 0.19  | 1.67 | 11.93  | 32.20    | 8.80x10 <sup>-01</sup> | 2.22x10 <sup>-02</sup>  |
|        | Peptide                                | npffr2         | neuropeptide FF receptor 2                                         | 0.95  | 2.42 | 16.49  | 47.97    | 1.52x10 <sup>-01</sup> | 4.66x10 <sup>-07</sup>  |
|        | Peptide                                | gpr37          | prosaposin receptor GPR37                                          | 0.25  | 1.81 | 28.96  | 84.17    | 7.03x10 <sup>-01</sup> | 3.88x10 <sup>-06</sup>  |
|        | Secretin receptor family               | LOC100710271   | pituitary adenylate cyclase-activating polypeptide type 1 receptor | -0.97 | 1.64 | 3.32   | 19.55    | 2.86x10 <sup>-01</sup> | 1.42x10 <sup>-03</sup>  |
|        | Vision                                 | LOC100690289   | melanopsin-A                                                       | 0.04  | 2.06 | 28.74  | 114.54   | 9.63x10 <sup>-01</sup> | 9.10x10 <sup>-06</sup>  |
| LH&FSH | Adhesion receptor family               | adgrb3         | adhesion G protein-coupled receptor B3 isoform X6                  | 2.35  | 2.95 | 114.02 | 81.29    | 1.06x10 <sup>-03</sup> | 8.13x10 <sup>-02</sup>  |
|        | Biogenic amine                         | LOC100704531   | D(4) dopamine receptor                                             | 3.26  | 2.86 | 326.07 | 374.24   | 2.56x10 <sup>-09</sup> | 8.86x10 <sup>-12</sup>  |
|        | Lipid                                  | ptgfr          | prostaglandin F2-alpha receptor                                    | 2.28  | 0.58 | 9.08   | 13.13    | 3.12x10 <sup>-02</sup> | 1.43x10 <sup>-03</sup>  |
|        | Metabotropic glutamate receptor family | LOC100695498   | gamma-aminobutyric acid type B receptor subunit 1 isoform X1       | 1.73  | 2.06 | 370.19 | 464.45   | 1.78x10 <sup>-17</sup> | 1.40x10 <sup>-26</sup>  |
|        | Metabotropic glutamate receptor family | LOC100712211   | G-protein coupled receptor family C group 5 member C isoform X2    | 1.88  | 2.13 | 41.02  | 48.16    | 1.09x10 <sup>-04</sup> | 1.69x10 <sup>-06</sup>  |
|        | Metabotropic glutamate receptor family | gpr158a        | probable G-protein coupled receptor 158 isoform X2                 | 1.63  | 1.73 | 241.50 | 256.28   | 4.73x10 <sup>-15</sup> | 2.49x10 <sup>-18</sup>  |
|        | Others                                 | LOC100696877   | G-protein coupled receptor 3                                       | 1.06  | 0.57 | 44.62  | 13.23    | 6.40x10 <sup>-05</sup> | 3.70x10 <sup>-01</sup>  |
|        | Peptide                                | LOC100695300   | neuropeptides B/W receptor type 2                                  | 2.14  | 2.33 | 125.11 | 118.99   | 1.06x10 <sup>-04</sup> | 1.04x10 <sup>-04</sup>  |
|        | Peptide                                | XP_005475771.1 | probable G-protein coupled receptor 19                             | 1.46  | 1.82 | 51.75  | 68.00    | 2.99x10 <sup>-06</sup> | 9.15x10 <sup>-11</sup>  |
|        | Peptide                                | LOC100691599   | relaxin-3 receptor 1                                               | 1.55  | 1.46 | 25.89  | 18.78    | 5.03x10 <sup>-05</sup> | 2.10x10 <sup>-04</sup>  |

**Table S5.** GPCRs identified in BRITE functional analysis in females.

|    | BRITE Functional Hierarchies | Gene ID      | Protein Name                                      | log2FoldChange |             | Av_Norm |      | Padj                   |                        |
|----|------------------------------|--------------|---------------------------------------------------|----------------|-------------|---------|------|------------------------|------------------------|
|    |                              |              |                                                   | LH.V S.neg     | FSH.V S.neg | LH      | FS H | LH.V S.Neg             | FSH.V S.Neg            |
| LH | Adhesion receptor family     | LOC100705251 | adhesion G protein-coupled receptor B1 isoform X2 | 1.02           | -6.16       | 112.372 | 8.17 | 3.14x10 <sup>-03</sup> | 6.46x10 <sup>-55</sup> |
|    | Adhesion receptor family     | LOC102077352 | adhesion G-protein coupled receptor G1            | 1.68           | -4.73       | 29.68   | 0.23 | 9.37x10 <sup>-03</sup> | 1.63x10 <sup>-04</sup> |
|    | Base and nucleoside          | LOC100692921 | P2Y purinoceptor 12                               | 2.36           | -2.95       | 13.92   | 0.23 | 3.07x10 <sup>-02</sup> | 5.74x10 <sup>-02</sup> |
|    | Base and nucleoside          | p2ry6        | P2Y purinoceptor 6 isoform X1                     | 1.98           | -1.46       | 54.21   | 5.40 | 4.53x10 <sup>-04</sup> | 3.17x10 <sup>-02</sup> |

|     |                                        |              |                                                                               |       |       |        |        |                        |                        |
|-----|----------------------------------------|--------------|-------------------------------------------------------------------------------|-------|-------|--------|--------|------------------------|------------------------|
| FSH | Lipid                                  | LOC100701533 | G-protein coupled receptor 84                                                 | 1.80  | -4.69 | 18.89  | 0.00   | 5.14x10 <sup>-03</sup> | 1.88x10 <sup>-04</sup> |
|     | Lipid                                  | LOC102080433 | prostaglandin E2 receptor EP1 subtype isoform X2                              | 1.09  | -5.59 | 81.81  | 0.58   | 3.40x10 <sup>-03</sup> | 1.05x10 <sup>-09</sup> |
|     | Biogenic amine                         | LOC100534567 | muscarinic receptor 4 subtype isoform X1                                      | 1.55  | -1.02 | 35.40  | 6.06   | 4.53x10 <sup>-04</sup> | 6.83x10 <sup>-02</sup> |
|     | Biogenic amine                         | drd2         | D(2) dopamine receptor isoform X1                                             | 1.25  | 0.29  | 36.17  | 17.65  | 1.99x10 <sup>-03</sup> | 5.48x10 <sup>-01</sup> |
|     | Chemokine                              | LOC100708026 | C-C chemokine receptor type 3                                                 | 1.12  | -2.69 | 29.67  | 1.80   | 4.47x10 <sup>-02</sup> | 1.57x10 <sup>-04</sup> |
|     | Chemokine                              | cmklr1       | chemokine-like receptor 1                                                     | 3.14  | -1.31 | 12.63  | 1.20   | 8.66x10 <sup>-03</sup> | 4.48x10 <sup>-01</sup> |
|     | Chemokine                              | gpr1         | G-protein coupled receptor 1                                                  | 1.74  | -6.80 | 78.11  | 0.00   | 2.25x10 <sup>-04</sup> | 5.85x10 <sup>-09</sup> |
|     | Chemokine                              | LOC100711803 | chemokine XC receptor 1                                                       | 1.59  | -3.82 | 33.71  | 0.00   | 1.71x10 <sup>-06</sup> | 5.60x10 <sup>-03</sup> |
|     | Chemokine                              | LOC100691705 | chemokine XC receptor 1-like isoform X1                                       | 3.49  | -3.95 | 71.86  | 1.28   | 3.53x10 <sup>-04</sup> | 1.61x10 <sup>-07</sup> |
|     | Others                                 | LOC100698978 | integral membrane protein GPR137B                                             | 1.83  | -0.36 | 17.04  | 3.70   | 1.55x10 <sup>-02</sup> | 7.10x10 <sup>-01</sup> |
|     | Peptide                                | agtr1        | type-1 angiotensin II receptor isoform X1                                     | 1.57  | -6.55 | 58.63  | 0.00   | 7.70x10 <sup>-03</sup> | 4.70x10 <sup>-08</sup> |
|     | Peptide                                | LOC100534508 | putative gonadotropin-releasing hormone II receptor                           | 3.10  | -3.36 | 70.78  | 1.07   | 5.01x10 <sup>-13</sup> | 8.01x10 <sup>-04</sup> |
|     | Peptide                                | LOC102077197 | galanin receptor type 2                                                       | 1.49  | -4.08 | 26.91  | 0.89   | 1.16x10 <sup>-02</sup> | 3.68x10 <sup>-04</sup> |
|     | Peptide                                | ntsr1        | neurotensin receptor type 1 isoform X3                                        | 1.52  | -6.30 | 302.81 | 1.57   | 8.52x10 <sup>-04</sup> | 6.31x10 <sup>-16</sup> |
|     | Secretin receptor family               | gcgr         | glucagon receptor                                                             | 1.20  | -2.63 | 41.49  | 3.04   | 4.25x10 <sup>-03</sup> | 7.57x10 <sup>-06</sup> |
|     | Secretin receptor family               | LOC100710530 | pituitary adenylate cyclase-activating polypeptide type I receptor isoform X1 | 1.41  | -6.08 | 282.78 | 1.44   | 1.43x10 <sup>-03</sup> | 5.47x10 <sup>-17</sup> |
|     | Secretin receptor family               | ramp2        | receptor activity-modifying protein 2 isoform X1                              | 1.54  | -4.17 | 40.08  | 0.53   | 4.31x10 <sup>-02</sup> | 1.37x10 <sup>-04</sup> |
|     | Vision                                 | LOC100702425 | pinopsin isoform X1                                                           | 1.07  | -6.36 | 36.56  | 0.00   | 2.91x10 <sup>-01</sup> | 5.22x10 <sup>-07</sup> |
|     | Biogenic amine                         | htr1b        | 5-hydroxytryptamine receptor 1B                                               | 0.42  | 1.70  | 21.62  | 53.24  | 7.23x10 <sup>-01</sup> | 9.91x10 <sup>-04</sup> |
|     | Adhesion receptor family               | LOC100698301 | adhesion G protein-coupled receptor L1 isoform X3                             | -0.43 | 1.92  | 30.80  | 149.61 | 3.07x10 <sup>-01</sup> | 2.08x10 <sup>-18</sup> |
|     | Adhesion receptor family               | LOC102080577 | adhesion G-protein coupled receptor G7 isoform X2                             | -0.44 | 1.92  | 3.70   | 19.07  | 8.01x10 <sup>-01</sup> | 1.01x10 <sup>-03</sup> |
|     | Base and nucleoside                    | LOC102076535 | P2Y purinoceptor 14 isoform X2                                                | -1.86 | 3.31  | 0.57   | 26.76  | 3.44x10 <sup>-01</sup> | 2.19x10 <sup>-05</sup> |
|     | Biogenic amine                         | drd5         | D(1B) dopamine receptor                                                       | -1.53 | 2.08  | 2.35   | 26.53  | 1.60x10 <sup>-01</sup> | 1.86x10 <sup>-04</sup> |
|     | Chemokine                              | LOC100707345 | C-X-C chemokine receptor type 2                                               | 0.00  | 1.37  | 15.69  | 37.85  | 9.98x10 <sup>-01</sup> | 1.00x10 <sup>-03</sup> |
|     | Lipid                                  | LOC100708895 | free fatty acid receptor 3-like                                               | 1.06  | 5.21  | 0.60   | 14.05  | 7.83x10 <sup>-01</sup> | 3.74x10 <sup>-05</sup> |
|     | Metabotropic glutamate receptor family | gabbr2       | gamma-aminobutyric acid type B receptor subunit 2                             | 0.36  | 1.06  | 25.71  | 41.41  | 5.75x10 <sup>-01</sup> | 9.79x10 <sup>-04</sup> |
|     | Metabotropic glutamate receptor family | LOC100712211 | G-protein coupled receptor family C group 5 member C isoform X2               | 1.34  | 2.59  | 9.25   | 19.96  | 1.26x10 <sup>-01</sup> | 1.63x10 <sup>-05</sup> |
|     | Metabotropic glutamate receptor family | gprc5c       | G-protein coupled receptor family C group 5 member C isoform X3               | 0.10  | 0.98  | 62.80  | 109.78 | 8.03x10 <sup>-01</sup> | 1.83x10 <sup>-05</sup> |
|     | Metabotropic glutamate receptor family | LOC100705106 | LOW QUALITY PROTEIN: metabotropic glutamate receptor 7                        | -2.23 | 1.68  | 1.26   | 19.57  | 4.31x10 <sup>-02</sup> | 2.68x10 <sup>-03</sup> |
|     | Metabotropic glutamate receptor family | LOC100700221 | metabotropic glutamate receptor 4                                             | 0.93  | 1.29  | 12.07  | 14.88  | 2.56x10 <sup>-01</sup> | 2.39x10 <sup>-02</sup> |
|     | Metabotropic glutamate receptor family | grm5         | metabotropic glutamate receptor 5 isoform X2                                  | -0.03 | 3.83  | 26.87  | 392.39 | 9.85x10 <sup>-01</sup> | 2.50x10 <sup>-31</sup> |
|     | Metabotropic glutamate receptor family | gprc5a       | retinoic acid-induced protein 3                                               | -1.35 | 4.03  | 1.94   | 67.55  | 3.83x10 <sup>-01</sup> | 4.00x10 <sup>-10</sup> |



|        |                                        |              |                                                                    |       |      |            |             |                            |                             |
|--------|----------------------------------------|--------------|--------------------------------------------------------------------|-------|------|------------|-------------|----------------------------|-----------------------------|
| LH&FSH | Others                                 | gpr12        | G-protein coupled receptor 12                                      | 0.49  | 1.01 | 30.4<br>6  | 42.7<br>5   | 5.67x1<br>0 <sup>-01</sup> | 3.01x1<br>0 <sup>-02</sup>  |
|        | Others                                 | gpr153       | probable G-protein coupled receptor 153 isoform X1                 | 0.13  | 1.13 | 34.8<br>2  | 70.4<br>9   | 8.60x1<br>0 <sup>-01</sup> | 5.35x1<br>0 <sup>-06</sup>  |
|        | Others                                 | gpr85        | probable G-protein coupled receptor 85                             | 0.59  | 1.41 | 41.0<br>7  | 72.7<br>4   | 1.98x1<br>0 <sup>-01</sup> | 2.93x1<br>0 <sup>-06</sup>  |
|        | Peptide                                | LOC100700667 | cholecystokinin receptor                                           | 1.56  | 8.85 | 55.4<br>3  | 882<br>6.10 | 6.91x1<br>0 <sup>-05</sup> | 7.88x1<br>0 <sup>-174</sup> |
|        | Peptide                                | LOC100534509 | GnRH receptor type2                                                | -1.29 | 1.99 | 5.49       | 52.0<br>6   | 1.65x1<br>0 <sup>-01</sup> | 4.67x1<br>0 <sup>-04</sup>  |
|        | Peptide                                | npffr2       | neuropeptide FF receptor 2                                         | 0.72  | 1.05 | 14.9<br>1  | 19.3<br>6   | 3.59x1<br>0 <sup>-01</sup> | 3.72x1<br>0 <sup>-02</sup>  |
|        | Peptide                                | gpr37        | prosaposin receptor GPR37                                          | 0.03  | 2.41 | 9.96       | 49.9<br>9   | 9.89x1<br>0 <sup>-01</sup> | 3.23x1<br>0 <sup>-08</sup>  |
|        | Peptide                                | LOC100710302 | somatostatin receptor type 5 isoform X3                            | 0.00  | 2.08 | 31.6<br>5  | 137.<br>92  | 9.99x1<br>0 <sup>-01</sup> | 1.26x1<br>0 <sup>-21</sup>  |
|        | Secretin receptor family               | LOC100710271 | pituitary adenylate cyclase-activating polypeptide type I receptor | -0.03 | 2.11 | 3.13       | 13.1<br>1   | 9.93x1<br>0 <sup>-01</sup> | 3.62x1<br>0 <sup>-02</sup>  |
|        | Biogenic amine                         | LOC100704531 | D(4) dopamine receptor                                             | 1.52  | 1.64 | 230.<br>68 | 248.<br>82  | 6.56x1<br>0 <sup>-05</sup> | 2.63x1<br>0 <sup>-06</sup>  |
|        | Adhesion receptor family               | adgrb2       | adhesion G protein-coupled receptor B2 isoform X5                  | 1.23  | 0.80 | 193.<br>34 | 144.<br>30  | 4.27x1<br>0 <sup>-04</sup> | 2.01x1<br>0 <sup>-02</sup>  |
|        | Metabotropic glutamate receptor family | LOC100695498 | gamma-aminobutyric acid type B receptor subunit 1 isoform X1       | 0.84  | 1.30 | 191.<br>00 | 262.<br>85  | 9.84x1<br>0 <sup>-06</sup> | 1.08x1<br>0 <sup>-14</sup>  |

**Table S6.** Dominant genes of gonadotroph cells that are conserved in rat and tilapia. Values are the average of the normalized read counts in tilapia LH and FSH cells.

|     | Rat_ID  | ZF_ID   | Protein Name                                                  | Normalized Read Counts |           |          |           |
|-----|---------|---------|---------------------------------------------------------------|------------------------|-----------|----------|-----------|
|     |         |         |                                                               | Male                   |           | Female   |           |
|     |         |         |                                                               | LH Cells               | FSH Cells | LH Cells | FSH Cells |
| LH  | Lhb     | lhb     | gonadotropin subunit beta-2                                   | 5653.06                | 20.29     | 1334.85  | 12.76     |
|     | KCNMB4  | kcmb2   | calcium-activated potassium channel subunit beta-4 isoform X1 | 276.29                 | 44.56     |          |           |
|     | GnRH    | gnrhr4  | putative gonadotropin-releasing hormone II receptor           | 226.32                 | 2.48      | 70.78    | 1.07      |
|     | FOXP2   | foxp2   | forkhead box protein P2                                       | 93.40                  | 54.76     |          |           |
|     | CD164L2 | cd164l2 | CD164 sialomucin-like 2 protein isoform X2                    | 35.01                  | 1.18      |          |           |
|     | OTOF    | otofb   | otoferlin                                                     | 22.26                  | 3.27      |          |           |
|     | TGFBR3L | engl    | transforming growth factor beta receptor type 3               |                        |           | 14.39    | 0.83      |
| FSH | Fshb    | fshb    | follicleotropin subunit beta isoform X1                       | 193.54                 | 48573.70  | 37.09    | 30114.06  |
|     | KCNH6   | kcnh6a  | potassium voltage-gated channel subfamily H member 6          | 519.90                 | 1509.48   | 305.64   | 951.50    |
|     | TGFBR3  | tgfr3   | transforming growth factor beta receptor type 3 isoform X2    | 46.17                  | 1463.64   | 21.17    | 676.10    |
|     | OTOF    | otofa   | otoferlin isoform X6                                          | 468.34                 | 1350.29   | 169.90   | 938.71    |
|     | RFX3    | rxf3    | transcription factor RFX3                                     | 528.46                 | 638.25    | 172.65   | 360.11    |
|     | KCNA4   | kcna4   | potassium voltage-gated channel subfamily A member 4          | 152.66                 | 637.44    | 80.95    | 345.96    |
|     | CAMTA1  | camta1a | calmodulin-binding transcription activator 1                  | 219.79                 | 363.04    | 107.32   | 174.30    |
|     | AR      | Ar-α    | androgen receptor alpha                                       |                        |           | 65.14    | 170.60    |
|     | RGS4    | rgs4    | regulator of G-protein signaling 5                            | 142.28                 | 258.37    | 41.53    | 132.67    |
|     | VASH2   | vash2   | vasohibin-2                                                   | 103.83                 | 231.13    | 58.92    | 120.79    |
|     | AR      | ar      | androgen receptor-like                                        | 136.69                 | 217.90    | 29.14    | 128.77    |

|                     |        |         |                                                               |        |        |        |        |
|---------------------|--------|---------|---------------------------------------------------------------|--------|--------|--------|--------|
|                     | CAMTA1 | camta1a | calmodulin-binding transcription activator 1 isoform X4       | 127.42 | 173.42 |        |        |
|                     | NTRK3  | ntnr3b  | NT-3 growth factor receptor isoform X1                        | 46.69  | 167.79 |        |        |
|                     | KCNA4  | kcn4-p  | potassium voltage-gated channel subfamily A member 4, partial | 32.62  | 115.80 | 14.33  | 84.77  |
|                     | AR     | ar      | androgen receptor                                             | 56.07  | 97.78  | 16.18  | 46.90  |
|                     | AIF1L  | aif1l   | allograft inflammatory factor 1-like                          | 36.07  | 80.26  | 17.59  | 49.91  |
|                     | FKBP1B | fkbp1b  | peptidyl-prolyl cis-trans isomerase FKBP1B isoform X3         | 40.48  | 74.02  | 17.88  | 32.12  |
|                     | GnRHR  | gnrhr1  | GnRH receptor type2                                           | 11.63  | 48.04  | 5.49   | 33.49  |
|                     | RNF183 | rnf183  | serine/arginine repetitive matrix protein 1                   | 5.17   | 15.43  | 4.16   | 13.79  |
| <b>LH &amp; FSH</b> | GJD2   | gjd2b   | gap junction delta-2 protein                                  | 530.56 | 675.62 | 369.08 | 359.40 |

**Table S7.** conserved GPCRs in rat and tilapia gonadotrophs. For the rat values are the mean expression of the single cell gonadotrophs, for the tilapia values are the average of the normalized read counts in LH and FSH cells.

|        | Rat ID    | Rat             |        | ZF_ID     | Tilapia                |          |         |          |
|--------|-----------|-----------------|--------|-----------|------------------------|----------|---------|----------|
|        |           | Mean Expression |        |           | Normalized Read Counts |          |         |          |
|        |           | Male            | Female |           | LH Cell                | FSH Cell | LH Cell | FSH Cell |
| LH     | Gnrhr     | 8.21            | 7.57   | gnrhr3    | 226.32                 | 2.48     | 70.78   | 1.07     |
|        | Adcyap1r1 | 0.75            | 0.05   | Adcyap1r2 | 324.66                 | 6.14     | 282.78  | 1.44     |
|        | Gpr158    | 0.12            | 0.06   | gpr158    | 146.57                 | 18.84    |         |          |
|        | Sstr3     | 0.10            | 0.13   | sstr3     | 71.43                  | 35.19    |         |          |
|        | Ramp1     |                 | 0.12   | Ramp1     | 22.35                  | 2.78     |         |          |
|        | Gpr137    | 0.09            | 0.12   | Gpr137    |                        |          | 17.04   | 3.70     |
| FSH    | Gprc5c    | 0.06            | 0.04   | gprc5d(3) | 130.50                 | 229.61   | 62.80   | 109.78   |
|        | Adgrl1    | 0.26            | 0.44   | adgrl1    | 84.98                  | 294.62   | 30.80   | 149.61   |
|        | Gpr85     | 0.39            | 0.28   | Gpr86     | 83.96                  | 166.59   | 41.07   | 72.74    |
|        | Gabbr2    | 0.11            | 0.06   | Gabbr2    | 46.18                  | 76.40    | 25.71   | 41.41    |
|        | Gabbr1    | 0.16            | 0.19   | gabbr1(3) | 40.52                  | 7.59     | 73.83   | 173.49   |
|        | Gnrhr     | 8.21            | 7.57   | gnrhr1    | 11.63                  | 48.04    | 5.49    | 52.06    |
|        | Fzd5      | 0.08            | 0.06   | Fzd5      | 6.07                   | 35.77    |         |          |
|        | Sstr3     | 0.10            | 0.13   | sstr5     |                        |          | 31.65   | 137.92   |
| LH&FSH | Celsr3    | 0.10            | 0.03   | Celsr3    | 665.82                 | 706.36   |         |          |
|        | Gabbr1    | 0.16            | 0.19   | gabbr1(1) | 370.19                 | 464.45   | 191.00  | 262.85   |
|        | Gpr158    | 0.12            | 0.06   | gpr158(2) | 241.50                 | 256.28   |         |          |
|        | Gpr153    |                 | 0.06   | Gpr153    | 78.19                  | 126.52   | 34.82   | 70.49    |
|        | Gpr19     | 0.14            | 0.19   | Gpr19     | 51.75                  | 68.00    |         |          |
|        | Gprc5c    | 0.06            | 0.04   | gprc5d(2) | 41.02                  | 48.16    | 9.25    | 19.96    |

**Table S8.** Distribution of the number of genes according to the normalized reads (NR) counts in each RNA-seq sample.

Males

| Cells           | NR > 0 ° | 0 < NR ≤ 1 ° | 1 < NR ≤ 10 ° | 10 < NR ≤ 100 ° | NR > 100 ° |
|-----------------|----------|--------------|---------------|-----------------|------------|
| <b>Before</b>   | 22,098   | 494          | 6,880         | 9,433           | 5,291      |
| <b>LH</b>       | 21,880   | 1,775        | 5,945         | 8,667           | 5,493      |
| <b>FSH</b>      | 21,728   | 3,582        | 5,558         | 7,247           | 5,341      |
| <b>Negative</b> | 22,090   | 356          | 6,546         | 9,602           | 5,586      |

Females

| Vells           | NR > 0 ° | 0 < NR ≤ 1 ° | 1 < NR ≤ 10 ° | 10 < NR ≤ 100 ° | NR > 100 ° |
|-----------------|----------|--------------|---------------|-----------------|------------|
| <b>Before</b>   | 22,382   | 1,716        | 8,125         | 9,436           | 3,105      |
| <b>LH</b>       | 22,179   | 2,399        | 7,364         | 9,032           | 3,384      |
| <b>FSH</b>      | 20,472   | 4,281        | 5,388         | 7,449           | 3,354      |
| <b>Negative</b> | 22,275   | 1,641        | 7,877         | 9,418           | 3,339      |
